# Supplementary material for: Comparing Ancient DNA Preservation in Petrous Bone and Tooth Cementum
Source: PubMed Central journal article supplement (PMC5271384; doi:10.1371/journal.pone.0170940), 2017-01-27

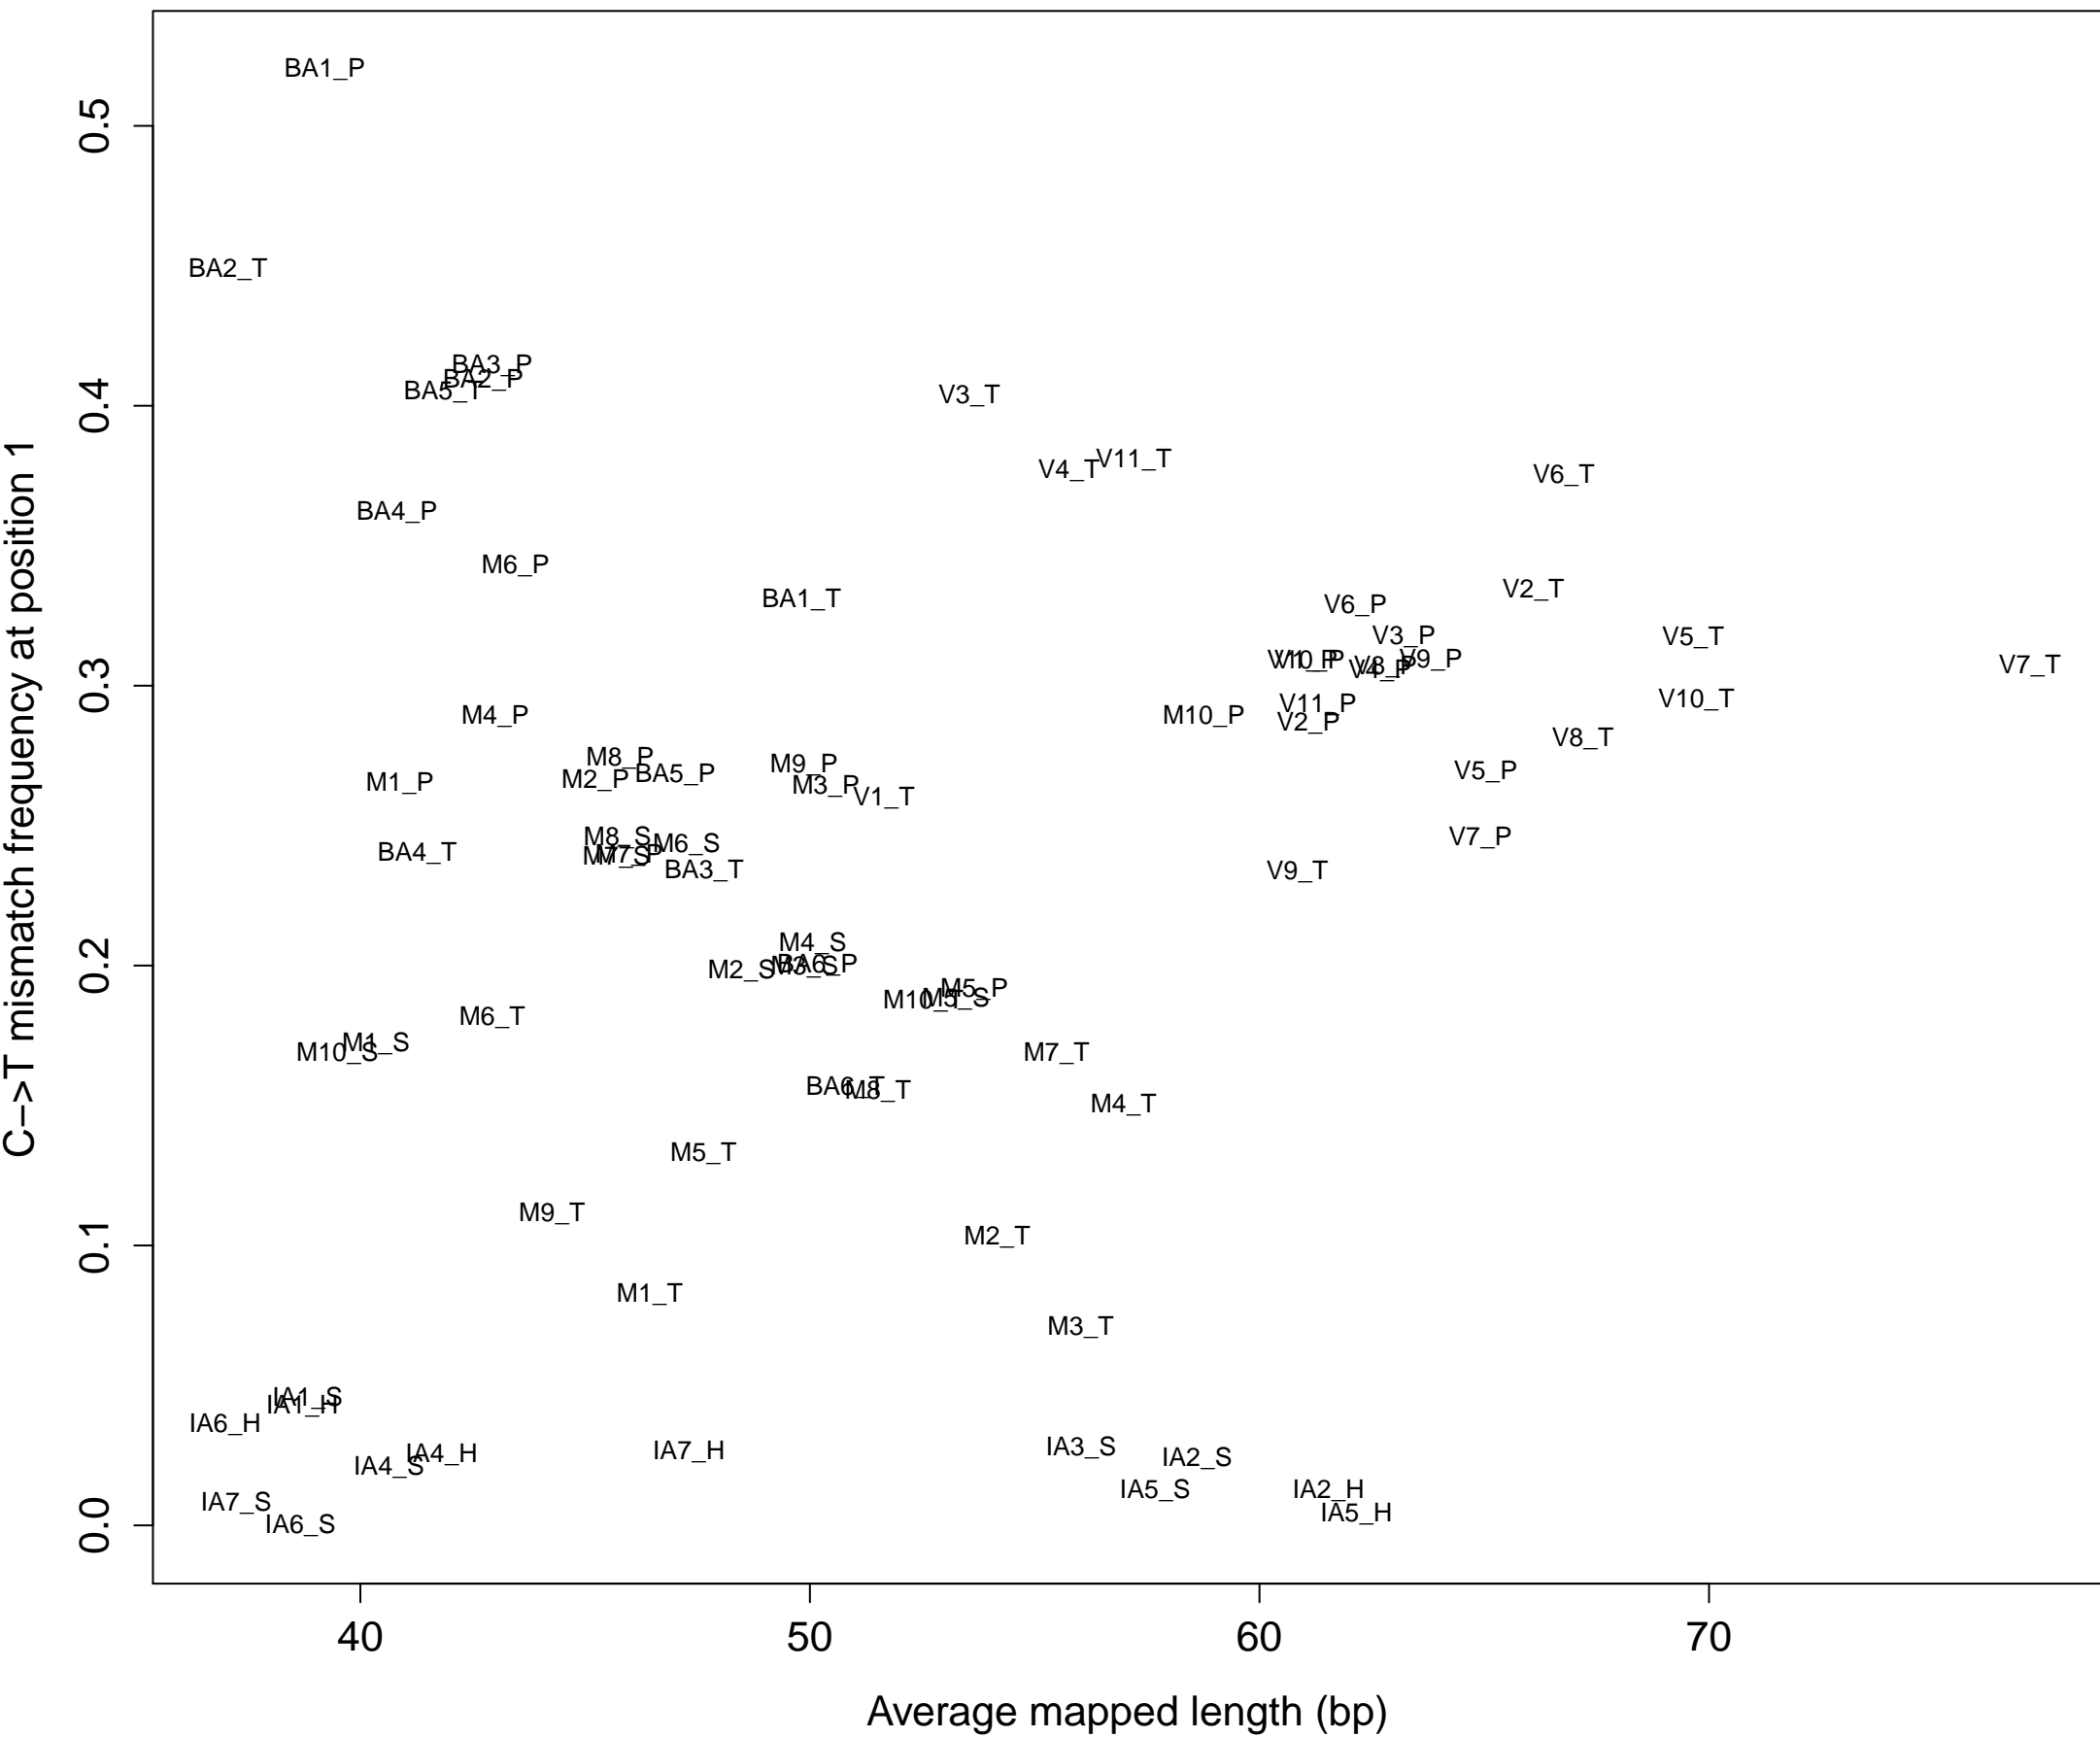

Supplement: pone.0170940.s002.pdf [file pone.0170940.s002.pdf]
