# Supplementary material for: Comparing Ancient DNA Preservation in Petrous Bone and Tooth Cementum
Source: PLoS One. 2017 Jan 27;12(1):e0170940. doi: 10.1371/journal.pone.0170940 (PMC5271384; doi:10.1371/journal.pone.0170940)
Supplement: S1 Table — (XLS) [file pone.0170940.s003.xls]

## Sheet: Sheet1
Sample name	Extract #	Age	Substrate	Visual preservation	Total Sequences	Retained Sequences	Uniquely mapped Sequences	Non-clonal Sequences	Clonality (%)	Endogenous DNA Fraction (%)	Sequencing Efficiency	Average length (bp) Of mapped sequences	Nuclear genomic Coverage	Mitogenomic Coverage	mtDNA/nuDNA	Decay Constant	True theoretical DNA Length	R-square fit To exponential Model	C → T mismatch Frequency at Position 1	DeltaS Mean	DeltaS SE	Lambda Mean	Lambda SE	Probability Authentic	Lower Quantile (2.5%)	Higher Quantile (97.5%)	Contamination %	GpC/CpG ratio
H1T	MA1167	Historical	Tooth	Well preserved	23643367	19124098	10731158	10003324	6.78244	56.1133	42.3092	46.4388	0.148175	13.9699	94.2799	0.064	15.589	0.926	0.0826881	0.29158	0.000929349	0.495613	0.0010544	0.997528	0.962097	0.999595	0.24721	0.24511
H1P	MA1168	Historical	Petrous	Well preserved	12829091	9205657	5043520	5005828	0.747335	54.7872	39.0194	40.8815	0.0650034	7.03959	108.296	0.108	9.237	0.99	0.265272	0.687001	0.00100912	0.309365	0.000571458	0.997174	0.938151	0.999552	0.28258	0.255161
H1S	MA1169	Historical	Parietal	Well preserved	10035047	5254659	115789	115341	0.386911	2.20355	1.14938	40.3446	0.00147272	0.447824	304.08	0.114	8.801	0.993	0.172432	0.464711	0.0072212	0.372681	0.00615088	NA	NA	NA		0.27992
H2T	MA1170	Historical	Tooth	Well preserved	8219380	4998704	1625455	1603950	1.32301	32.5175	19.5142	54.166	0.0276964	7.76619	280.405	0.033	29.946	0.953	0.102961	0.34105	0.0026759	0.500869	0.00264805	0.995948	0.941029	0.999452	0.40518	0.239403
H2P	MA1171	Historical	Petrous	Well preserved	42244695	30843793	16477962	16269244	1.26665	53.4239	38.5119	45.2303	0.234153	18.8383	80.4529	0.065	15.375	0.987	0.266092	0.731258	0.000659817	0.34458	0.000326351	0.998568	0.978149	0.999742	0.14318	0.240353
H2S	MA1172	Historical	Parietal	Well preserved	11041823	7187425	195944	194412	0.781856	2.72621	1.76069	48.4824	0.00300785	0.51017	169.613	0.056	17.868	0.979	0.198254	0.517353	0.005715	0.353537	0.00450039	NA	NA	NA		0.259224
H3T	MA1173	Historical	Tooth	Well preserved	40034098	35367823	26050658	25650296	1.53686	73.6564	64.0711	56.0256	0.460711	20.6845	44.897	0.023	44.268	0.906	0.0707162	0.317454	0.000802662	0.599609	0.000738653	0.998444	0.981419	0.999748	0.15564	0.240348
H3P	MA1174	Historical	Petrous	Poorly preserved	18285612	14525274	6044881	5995771	0.812423	41.6163	32.7896	50.3544	0.0964878	12.987	134.598	0.044	22.817	0.99	0.2642	0.675086	0.0010401	0.326443	0.000618342	0.992946	0.959904	0.999352	0.70543	0.239468
H3S	MA1175	Historical	Parietal	Well preserved	12569292	8544099	874619	867570	0.805951	10.2365	6.9023	49.881	0.0138151	2.58869	187.381	0.053	18.746	0.977	0.199853	0.508375	0.00263411	0.344507	0.00219543	NA	NA	NA		0.24922
H4P	MA1177	Historical	Petrous	Poorly preserved	12668469	8546087	2982446	2965198	0.578317	34.8984	23.4061	42.9997	0.0405419	4.1938	103.444	0.092	10.926	0.994	0.289025	0.808347	0.00161361	0.363215	0.000706091	NA	NA	NA		0.241666
H4T	MA1178	Historical	Tooth	Well preserved	14354485	12501291	2253784	2228392	1.12664	18.0284	15.524	56.9785	0.0407754	13.8732	340.235	0.021	46.554	0.937	0.150393	0.471258	0.00240342	0.463187	0.00168703	0.998255	0.97223	0.999629	0.17453	0.228892
H4S	MA1179	Historical	Parietal	Poorly preserved	6913202	5325924	397364	393489	0.975176	7.46094	5.69185	50.0608	0.00630451	1.04901	166.39	0.05	20.074	0.983	0.208055	0.562149	0.00453146	0.372042	0.00307932	NA	NA	NA		0.249216
H5P	MA1180	Historical	Petrous	Well preserved	2793133	2077564	144805	1678	98.8412	6.96994	0.0600759	53.6575	2.87054e-05	0	0	0.042	23.546	0.807	0.191646	0.452624	0.0558841	0.312261	0.0507602	NA	NA	NA		0.231014
H5T	MA1181	Historical	Tooth	Well preserved	15634840	11282332	1602103	1595088	0.437862	14.2001	10.2021	47.6317	0.0242463	2.18166	89.9794	0.058	17.36	0.958	0.133033	0.352948	0.00183949	0.365927	0.00187529	NA	NA	NA		0.256075
H5S	MA1182	Historical	Parietal	Poorly preserved	3394305	2897815	2353	2347	0.254994	0.0811991	0.0691452	53.2456	3.97975e-05	0.00259521	65.2103	0.047	21.23	0.819	0.188256	0.428983	0.0471461	0.295159	0.0472276	NA	NA	NA		0.249394
H6P	MA1183	Historical	Petrous	Poorly preserved	19245474	12278247	581558	579675	0.323785	4.73649	3.01201	43.4522	0.00802522	0.750438	93.5099	0.083	12.024	0.994	0.342861	0.999817	0.000183195	0.396826	0.000785751	NA	NA	NA		0.22476
H6T	MA1184	Historical	Tooth	Well preserved	12950096	6016112	1243567	1231326	0.984346	20.6706	9.50824	42.9348	0.016832	2.54632	151.279	0.096	10.398	0.997	0.181631	0.560795	0.00297762	0.441959	0.00171547	NA	NA	NA		0.241879
H6S	MA1185	Historical	Parietal	Poorly preserved	7555119	4004362	10767	10709	0.538683	0.268882	0.141745	47.2564	0.000160852	0.0249261	154.963	0.07	14.229	0.973	0.24336	0.710421	0.0310648	0.404704	0.0157597	NA	NA	NA		0.260533
H7P	MA1187	Historical	Petrous	Well preserved	8768821	7860336	4428397	4333704	2.13831	56.3385	49.4217	45.9771	0.0638763	9.20025	144.032	0.081	12.417	0.99	0.239622	0.623733	0.00121739	0.343365	0.00075051	0.976531	0.935129	0.995318	2.34694	0.282658
H7T	MA1188	Historical	Tooth	Well preserved	9180159	8109451	382665	380438	0.581971	4.71875	4.14413	55.487	0.00678363	2.55574	376.75	0.037	26.688	0.971	0.168641	0.540678	0.00643466	0.47716	0.00393123	NA	NA	NA		0.230066
H7S	MA1189	Historical	Parietal	Poorly preserved	5579925	4053837	72045	70516	2.12228	1.77721	1.26374	45.6992	0.00102805	0.207617	201.952	0.076	13.084	0.99	0.238826	0.643728	0.011597	0.387122	0.00720407	NA	NA	NA		0.270718
H8P	MA1190	Historical	Petrous	Well preserved	12722298	8869002	3882332	3856977	0.653087	43.7742	30.3167	45.7758	0.0562853	4.46883	79.3959	0.068	14.807	0.996	0.274368	0.836966	0.00160874	0.407217	0.000654818	NA	NA	NA		0.239776
H8T	MA1191	Historical	Tooth	Well preserved	22486137	14254607	1075153	1067219	0.737941	7.54249	4.74612	51.5137	0.0175898	4.01726	228.386	0.045	22.381	0.995	0.155339	0.481645	0.0030301	0.445683	0.00205155	NA	NA	NA		0.229946
H8S	MA1192	Historical	Parietal	Well preserved	6167427	2193651	5728	5713	0.261872	0.261117	0.0926318	45.7213	8.29539e-05	0.00965659	116.409	0.066	15.251	0.957	0.245993	0.660078	0.0340303	0.349996	0.0193664	NA	NA	NA		0.278797
H9P	MA1193	Historical	Petrous	Well preserved	12026170	9819302	4244158	4215382	0.678014	43.2226	35.0517	49.8702	0.0673254	9.56763	142.11	0.05	19.89	0.986	0.271626	0.690314	0.00136459	0.341449	0.000793959	0.996993	0.944663	0.999421	0.30074	0.237187
H9T	MA1194	Historical	Tooth	Well preserved	14124478	9426364	121655	121297	0.294275	1.29058	0.858772	44.2645	0.00171065	0.49146	287.295	0.088	11.385	0.972	0.111446	0.325596	0.00797353	0.432411	0.0091103	NA	NA	NA		0.258401
H10P	MA1196	Historical	Petrous	Well preserved	2399751	1978798	70130	69856	0.390703	3.54407	2.91097	58.7598	0.00131819	0.217696	165.147	0.026	37.838	0.933	0.289235	0.669263	0.0092903	0.292626	0.00608836	NA	NA	NA		0.226848
H10T	MA1197	Historical	Tooth	Well preserved	3398725	2591140	4333	4317	0.369259	0.167224	0.127018	52.5253	7.20817e-05	0.0337981	468.885	0.05	20.18	0.966	0.187308	0.558268	0.047837	0.41911	0.0299966	NA	NA	NA		0.247047
H10S	MA1198	Historical	Parietal	Poorly preserved	14107285	3517978	6592	6578	0.212379	0.18738	0.0466284	39.4918	8.19639e-05	0.0126139	153.896	0.111	8.971	0.949	0.168962	0.552395	0.0507947	0.452181	0.0350794	NA	NA	NA		0.287146
BA1P	MA1200	Bronze Age	Petrous	Well preserved	9992868	6642208	30547	29540	3.29656	0.459892	0.295611	39.2085	0.000366394	0.0130364	35.5802	0.132	7.596	0.991	0.520235	0.999725	0.000275356	0.292996	0.00259197	NA	NA	NA		0.201644
BA1T	MA1201	Bronze Age	Tooth	Well preserved	9113051	6465890	246494	243927	1.0414	3.81222	2.67668	49.8147	0.00388474	0.541554	139.405	0.048	20.889	0.988	0.330756	0.99834	0.00158226	0.402341	0.00132654	NA	NA	NA		0.202631
BA2P	MA1202	Bronze Age	Petrous	Well preserved	8543920	6486126	2076504	2028176	2.32737	32.0145	23.7382	42.734	0.0275625	1.24172	45.0509	0.086	11.641	0.993	0.409176	0.99999	9.72368e-06	0.356582	0.000349474	NA	NA	NA		0.192825
BA2T	MA1203	Bronze Age	Tooth	Well preserved	8012576	3466233	1814779	1718739	5.2921	52.3559	21.4505	37.057	0.0200918	1.17623	58.5428	0.177	5.663	0.997	0.448695	0.99999	1.01181e-05	0.286765	0.00039642	NA	NA	NA		0.244482
BA3P	MA1204	Bronze Age	Petrous	Well preserved	8618593	6894545	8385	8326	0.703637	0.121618	0.0966051	42.9307	0.000113079	0	0	0.082	12.266	0.988	0.414536	0.997564	0.00239872	0.337577	0.00542896	NA	NA	NA		0.225719
BA3T	MA1205	Bronze Age	Tooth	Well preserved	6535410	3668344	3800	3790	0.263158	0.103589	0.0579918	47.6454	5.70376e-05	0.00482829	84.651	0.054	18.687	0.95	0.234043	0.796988	0.0561319	0.443781	0.0236676	NA	NA	NA		0.257752
BA4P	MA1206	Bronze Age	Petrous	Well preserved	6942194	5157002	297619	296097	0.511392	5.77116	4.26518	40.8137	0.00383263	0.284266	74.17	0.106	9.415	0.994	0.362011	0.999828	0.000171793	0.377482	0.00108036	NA	NA	NA		0.236408
BA4T	MA1207	Bronze Age	Tooth	Well preserved	6682226	3652522	254213	250516	1.45429	6.95993	3.74899	41.2669	0.00327768	0.450178	137.346	0.098	10.186	0.999	0.240362	0.771527	0.00813742	0.457835	0.00361953	NA	NA	NA		0.228411
BA5P	MA1209	Bronze Age	Petrous	Poorly preserved	5811241	2664896	255353	72400	71.6471	9.5821	1.24586	47.0049	0.00107402	0.0890217	82.8868	0.061	16.454	0.981	0.268375	0.989806	0.00822444	0.499667	0.00348832	NA	NA	NA		0.225282
BA5T	MA1210	Bronze Age	Tooth	Well preserved	8704258	4735605	2890344	2649140	8.34517	61.0343	30.435	41.8518	0.0350466	2.62231	74.8234	0.091	10.965	0.998	0.405225	0.99999	1.0098e-05	0.3405	0.00032444	NA	NA	NA		0.234378
BA6P	MA1213	Bronze Age	Petrous	Well preserved	10268770	6619864	326467	323661	0.859505	4.93163	3.1519	50.1715	0.00518387	1.0682	206.062	0.051	19.54	0.957	0.200289	0.536646	0.00501687	0.379326	0.00383614	NA	NA	NA		0.241117
BA6T	MA1214	Bronze Age	Tooth	Well preserved	21652868	16285836	212384	211310	0.505688	1.3041	0.975898	50.7914	0.00342984	2.39375	697.919	0.044	22.811	0.991	0.156602	0.459947	0.00668126	0.413921	0.00602389	NA	NA	NA		0.277299
IA1P	MA1241	Iron Age	Petrous, cremated	cremated	13596460	6179309	410	376	8.29268	0.00663505	0.00276543	38.7086	4.47493e-06	0	0	NA	NA	NA	0.042735	0.219642	0.192095	0.608479	0.21527	NA	NA	NA
IA2P	MA1243	Iron Age	Petrous, cremated	cremated	7526256	6406135	1732	1195	31.0046	0.0270366	0.0158777	61.5369	2.34261e-05	0.0144849	618.323	NA	NA	NA	0.012605	0.0779108	0.10544	0.435879	0.209902	NA	NA	NA
IA3P	MA1246	Iron Age	Petrous, cremated	cremated	16434164	13938318	2042	1268	37.904	0.0146503	0.00771563	56.0331	2.24082e-05	0	0	NA	NA	NA	0.0279503	0.17986	0.204177	0.564611	0.319714	NA	NA	NA
IA4P	MA1248	Iron Age	Petrous, cremated	cremated	22271573	16156519	469	455	2.98507	0.00290285	0.00204296	41.8078	5.75638e-06	0	0	NA	NA	NA	0.0254237	0.193445	0.237369	0.696136	0.301484	NA	NA	NA
IA5P	MA1250	Iron Age	Petrous, cremated	cremated	13152787	10722478	2263	1028	54.5736	0.0211052	0.00781583	62.1574	2.03857e-05	0.0040437	198.359	NA	NA	NA	0.004329	0.289565	0.261147	0.851833	0.149913	NA	NA	NA
IA6P	MA1252	Iron Age	Petrous, cremated	cremated	22140452	10700447	339	328	3.24484	0.00316809	0.00148145	36.9915	3.69029e-06	0	0	NA	NA	NA	0.036036	0.247388	0.223108	0.681311	0.227154	NA	NA	NA
IA7P	MA1254	Iron Age	Petrous, cremated	cremated	27270920	17748761	834	776	6.95444	0.00469892	0.00284552	47.3086	1.11936e-05	0	0	NA	NA	NA	0.0264317	0.20219	0.198699	0.561268	0.264854	NA	NA	NA
V10T	AM286	Viking Age	Tooth	Poorly preserved	14448920	12893157	863931	571501	33.8488	6.70069	3.95532	69.717	0.0130695	31.4591	2407.06	0.0313768	31.8707	0.97931	0.29489	0.675093	0.00484329	0.384482	0.0032364	0.998501	0.975723	0.999706	0.14994	0.233132
V11T	AM288	Viking Age	Tooth	Poorly preserved	18644993	15961849	118006	110575	6.29714	0.7393	0.593055	57.2048	0.0020663	26.6761	12910.1	0.0490103	20.4039	0.974876	0.38078	0.963872	0.0120521	0.388659	0.00546285	0.999037	0.980229	0.999831	0.09625	0.258537
V1T	AM289	Viking Age	Tooth	Poorly preserved	20979348	16706260	5352211	1923256	64.0661	32.0372	9.16738	51.6434	0.032363	20.4146	630.799	0.0603796	16.5619	0.976099	0.260148	0.666076	0.00212503	0.36237	0.00133477	0.993311	0.970391	0.999313	0.66889	0.257439
V2T	AM293	Viking Age	Tooth	Poorly preserved	17132504	14753843	473450	213804	54.8413	3.20899	1.24794	66.094	0.00463364	11.0896	2393.28	0.0345541	28.9401	0.976755	0.334382	0.776052	0.00755702	0.36843	0.00441213	0.998239	0.962458	0.999682	0.17612	0.24032
V3T	AM294	Viking Age	Tooth	Poorly preserved	16299190	14296699	648253	149986	76.863	4.53428	0.920205	53.5472	0.0026157	34.8121	13308.9	0.054479	18.3557	0.955905	0.403533	0.999093	0.000893875	0.373919	0.0020373	0.994053	0.976341	0.999303	0.5947	0.26468
V8T	AM308	Viking Age	Tooth	Poorly preserved	26405175	24163491	895519	707602	20.9841	3.70608	2.67979	67.1928	0.0155574	65.5916	4216.11	0.0235434	42.4748	0.931127	0.281206	0.612564	0.00419973	0.365208	0.00330822	0.997617	0.983193	0.999744	0.23834	0.260277
V9T	AM310	Viking Age	Tooth	Poorly preserved	20264223	19696284	80230	79669	0.69924	0.407336	0.393151	60.8436	0.00158214	4.29006	2711.55	0.0319933	31.2566	0.964901	0.233528	0.739151	0.0216942	0.531049	0.0111399	NA	NA	NA		0.245851
V4T	AM318	Viking Age	Tooth	Poorly preserved	20702865	18978259	239678	102179	57.3682	1.26291	0.49355	55.7664	0.00185705	11.9903	6456.65	0.049962	20.0152	0.942802	0.377031	0.996509	0.00318902	0.398729	0.00274193	0.986133	0.937626	0.998238	1.38671	0.236007
V5T	AM319	Viking Age	Tooth	Poorly preserved	20508643	18803316	257996	158249	38.6622	1.37208	0.771621	69.6482	0.00360623	31.2802	8673.93	0.0199348	50.1635	0.890974	0.317366	0.66415	0.00916894	0.363721	0.00697642	0.998521	0.972066	0.999736	0.14791	0.22238
V6T	AM321	Viking Age	Tooth	Poorly preserved	18134352	16552860	1677575	437209	73.938	10.1347	2.41094	66.7685	0.00956082	38.01	3975.6	0.025773	38.8003	0.912061	0.375284	0.818145	0.00519813	0.34792	0.00297295	0.997076	0.96746	0.99953	0.29235	0.240406
V7T	AM322	Viking Age	Tooth	Poorly preserved	22538597	21297087	5299092	3988908	24.7247	24.8818	17.6981	77.1381	0.100642	36.8932	366.578	0.0137563	72.6939	0.920085	0.30726	0.568547	0.00146446	0.315694	0.00135813	0.980886	0.95912	0.99548	1.91142	0.24794
V10P	AM506	Viking Age	Petrous	Well preserved	22733529	21107755	14004826	13351393	4.66577	66.3492	58.73	61.0351	0.26152	19.5175	74.6311	0.0183726	54.4288	0.908689	0.308777	0.798794	0.000873941	0.374416	0.000408429	0.998522	0.981173	0.999739	0.1478	0.24108
V11P	AM507	Viking Age	Petrous	Well preserved	24802995	22957350	15002449	14570880	2.87666	65.3492	58.7465	61.2981	0.286612	20.9275	73.0166	0.0171808	58.2045	0.912112	0.293207	0.724404	0.000787049	0.366515	0.000410563	0.995909	0.966518	0.999499	0.40906	0.249551
V1P	AM508	Viking Age	Petrous	Well preserved	23425182	21710700	13697851	13351393	2.52929	63.0926	56.9959	61.0351	0.26152	19.5175	74.6311	0.0183726	54.4288	0.908689	0.308777	0.798804	0.000864175	0.374422	0.000406566	0.997323	0.980547	0.99975	0.26765	0.251194
V2P	AM509	Viking Age	Petrous	Well preserved	33120903	30699283	20039926	19468722	2.85033	65.2782	58.7808	61.0874	0.381822	28.1448	73.7118	0.0179003	55.865	0.896479	0.286783	0.745685	0.000708789	0.379708	0.000359693	0.999473	0.987552	0.999914	0.05272	0.236482
V3P	AM510	Viking Age	Petrous	Well preserved	34463696	32730531	21849654	21203127	2.95898	66.7562	61.5231	63.2108	0.430793	28.423	65.9784	0.0113072	88.4392	0.806341	0.317726	0.790138	0.000688585	0.370554	0.000329474	0.982689	0.962951	0.994175	1.73105	0.248058
V4P	AM511	Viking Age	Petrous	Well preserved	18324904	17070975	10686761	10424934	2.45001	62.6019	56.8894	62.6824	0.20996	18.7842	89.4658	0.0140686	71.0801	0.857859	0.305514	0.767113	0.000936987	0.370683	0.000461769	0.988498	0.960116	0.998784	1.15021	0.246938
V5P	AM512	Viking Age	Petrous	Well preserved	21933446	20744894	10143225	9851719	2.8739	48.895	44.9164	65.0318	0.20602	19.491	94.6073	0.00899333	111.193	0.676249	0.269327	0.693122	0.00111708	0.389883	0.000614282	0.966061	0.926466	0.987976	3.39388	0.240257
V6P	AM513	Viking Age	Petrous	Well preserved	24157512	22733223	14438829	14045809	2.72197	63.5142	58.1426	62.1319	0.280359	24.1562	86.1617	0.0139645	71.61	0.856818	0.328835	0.794292	0.000778976	0.34835	0.000382887	0.999464	0.986108	0.999913	0.05356	0.25233
V7P	AM514	Viking Age	Petrous	Well preserved	20695885	19392784	12830505	12506429	2.52582	66.1612	60.4295	64.9143	0.260884	17.6444	67.6332	0.00980644	101.974	0.569352	0.245681	0.603935	0.000818935	0.386775	0.000514821	0.99916	0.98385	0.999859	0.08396	0.253158
V8P	AM516	Viking Age	Petrous	Well preserved	33168127	31218565	20489392	19788202	3.42221	65.6321	59.6603	62.8049	0.399659	32.8337	82.1541	0.00891206	112.207	0.634811	0.30679	0.737607	0.000709682	0.368237	0.000380193	0.990583	0.972518	0.997601	0.94171	0.253841
V9P	AM517	Viking Age	Petrous	Well preserved	33054974	30838918	15960881	15523398	2.74097	51.7556	46.9624	63.8129	0.318683	27.1845	85.3025	0.00756106	132.257	0.619125	0.309118	0.77299	0.000798993	0.377812	0.000389808	0.999463	0.988479	0.999909	0.05374	0.263113
